# Supplementary material for: Self-Detoxifying Nanocatalytic Medicine CaO2@Cu-BAL for Enhanced Chemodynamic Therapy of Tumor
Source: Research Square preprint supplement (doi:10.21203/rs.3.rs-8464707/v1), 2026-01-01
Supplement: Supplementary file 1 [file e8f380b759ec1ab914cd5839.docx]

**Supplementary data**

**Self-Detoxifying Nanocatalytic Medicine CaO2@Cu-BAL for Enhanced Chemodynamic Therapy of Tumor**

**Ming Ana, c, 1 Wenchang Wua, 1, Chen Donga, Xiaoxing Lia, Xinyu Zhanga, Kun Gea, Guang Jiaa, Xueyi Wanga, Zhenghua Lid, Xingjie Liange, Jinchao Zhanga, *, Shutao Gaob, *, Yu Hana, ***

a College of Chemistry & Materials Science, Key Laboratory of Medicinal Chemistry and Molecular Diagnosis of Ministry of Education, State Key Laboratory of New Pharmaceutical Preparations and Excipients, Chemical Biology Key Laboratory of Hebei Province, Hebei University, Baoding 071002, P. R. China;

b College of Science Hebei Agricultural University Baoding 071001, P. R. China;

c Department of Orthopedics, Bao Ding NO.1 Central Hospital Baoding 071000, China

d The Tenth Affiliated Hospital, Southern Medical University (Dongguan People’s Hospital), Dongguan 523059, China

e CAS Key Laboratory for Biological Eﬀects of Nanomaterials and Nanosafety National Center for Nanoscience and Technology Beijing 100190, P. R. China

**Instruments and Characterization**

The morphology and elemental mapping of the synthesized nanocatalytic medicine were analyzed using transmission electron microscopy (TEM, Tecnai G2 F20 S-TWIN, FEI, USA) at 200 kV. The size distribution and ζ-potentials of the nanoparticles were measured using a Zeta PALS analyzer (ZEN3600, Malvern Instruments). X-ray diffraction (XRD) patterns of CaO2, Cu-BAL, and CaO2@Cu-BAL were recorded on a D8 Advance powder diffractometer (Bruker, Cu Kα radiation) operating at 40 kV and 40 mA, with a scanning range of 2θ = 10°–80°. UV–vis absorbance spectra were acquired using a UV–vis spectrophotometer (UV-2700, Shimadzu). Fourier-transform infrared (FTIR) spectroscopy was performed on a Nicolet iS10 FTIR spectrometer (Thermo Fisher Scientific, USA). The concentration of Cu ions in tissues and tumors was quantified using inductively coupled plasma optical emission spectrometry (ICP-OES, 5800, Agilent, USA). X-ray photoelectron spectroscopy (XPS) was conducted on a K-Alpha spectrometer (Thermo Scientific, USA). Flow cytometry data were collected using a BD FACSCalibur™ Flow Cytometer (BD Biosciences, USA). Confocal laser scanning microscopy (CLSM) images were obtained using an FV1000 system (Olympus, Japan).

**In Vitro Detection of H2O2 Generation**

The H2O2 Assay Kit (Solarbio, BC3595) was used to measure H2O2 production from CaO2@Cu-BAL. The absorbance of the yellow titanium peroxide complex (TiO22+) at 415 nm was monitored using a microplate reader (CytationTM5, BioTek, USA) following the manufacturer’s protocol.

**Generation of •OH by CaO2@Cu-BAL**

Hydroxyl radical (•OH) generation was verified using 5,5′-dimethyl-1-pyrroline-N-oxide (DMPO) as a trapping agent via electron spin resonance (ESR) spectroscopy (EMXmicro, Bruker, USA). Additionally, TMB was used as an •OH indicator for fluorescence spectrophotometry. Briefly, TMB solution (100 μL, 1 mM) and CaO2@Cu-BAL (100 μg) were dispersed in buffers of varying pH (3 mL, pH 5.0, 6.5, 7.4). After 5 min of reaction, the absorbance of oxidized TMB (ox-TMB) at 650 nm and 370 nm was recorded using a UV–vis spectrophotometer (UV-2700, Shimadzu).

To assess concentration-dependent •OH production, different quantities of CaO2@Cu-BAL (0, 45, 90, 120, 150, and 210 μg) were added to sodium acetate buffer (3 mL, pH 5.0) and shaken for 5 min. The absorbance spectra were recorded using a UV–vis spectrophotometer.

Meanwhile, a certain amount of CaO2@Cu-BAL was added to the sodium acetate buffer (3mL, pH 5.0) solution. Subsequently, appropriate amounts of o-phenylenediamine (OPD) and 2,2'-azino-bis(3-ethylbenzothiazoline-6-sulfonic acid) (ABTS) were introduced into the resultant solution, respectively. The absorbance values were recorded using an UV-Vis spectrophotometer.

**Catalytic Activities of Cu-BAL**

A reaction buffer was prepared by mixing sodium acetate buffer (3 mL, pH 5.0), TMB (0.1 mL, 1 M), and H2O2 (0.1 M). The catalytic activities of Cu-BAL, Fe3O4, and Fe2O3 were evaluated by monitoring the absorbance of ox-TMB at 320 nm. The catalytic rates were calculated using the Michaelis-Menten equation:

(1) V=Vmax[S]/(Km+[S])

V: initial velocity of the reaction, Vmax: maximal velocity of reaction, [S]: substrate concentration, Km: Michaelis–Menten constant.

If [S] >> Km , Km+[S] ≈ [S], through an easy deformation, the original Michaelis–Menten equation could be converted to be:

(2) V=Vmax

**Cell Culture**

Murine breast cancer 231 cells were obtained from the Cell Bank of the Chinese Academy of Sciences (Shanghai). The cells were seeded in Petri dishes at a density of 5×104 cells per dish and cultured in high-glucose DMEM supplemented with 10% FBS, penicillin (100 U/mL), and streptomycin (100 μg/mL) in a CO2 incubator (MCO-20AIC, Panasonic, Japan) at 37°C with 5% CO2.

**Co-localization Experiment and Intracellular •OH Production**

CaO2@Cu-BAL was labeled with RhB by mixing 5 mL of RhB/ethanol solution (1 mg/mL) with 2 mg of CaO2@Cu-BAL and stirring for 24 h in the dark. The RhB-labeled nanoparticles were collected by centrifugation at 10,000 rpm for 10 min and washed three times with ethanol.

For co-localization studies, 231 cells were seeded in confocal dishes and incubated with RhB-labeled CaO2@Cu-BAL (60 μg/mL) for 6 h. After washing with PBS, the cells were stained with Hoechst 33342 (100 nM) and Lyso-Tracker Green (100 nM) for 30 min and imaged using confocal microscopy (ZEISS, Germany).

Intracellular ROS generation was assessed by incubating 231 cells with DCFH-DA (2.5 μM) for 30 min after treatment with PBS, CaO2, Cu-BAL, or CaO2@Cu-BAL (50 μg/mL). Fluorescence was measured using a fluorescence microscope (Evos FL Auto, Life Technologies).

**Lysosomal Membrane Permeabilization**

231 cells were treated with CaO2@Cu-BAL (50 μg/mL) for 8 h, washed with PBS, and stained with AO (8 μg/mL) for 30 min. The cells were imaged using CLSM (excitation: 490 nm; emission: 528 nm for green, 617 nm for red).

**Lipid Peroxidation Assay**

231 cells were seeded in confocal culture dishesand. After 24 h of incubated with CaO2@Cu-BAL (50 μg/mL) for 12 h. the cells were rinsed carefully with PBS three times and incubated with 2mL PBS containing C11-BODIPY581/591dye (10 μM) and Hoechst 33342 staining (5 μg/mL) for 30 min. Subsequently, rinsed carefully with PBS and imaged with CLSM (Hoechst 33342, Emission: 460 nm, C11-BODIPY581/591, Emission: 580 nm for reduced form; Emission: 510 nm for Oxidized form).

**In Vitro Cytotoxicity Measurements**

The MTT assay was used to evaluate the cytotoxicity of various samples (CaO2,Cu-BAL and CaO2@Cu-BAL) ,231 cells were cultured in sextuplicate in a 96-well plate at a density 8×103 cells per well for 24 h at 37°C. After that, the culture media were replaced by fresh HDMEM medium containing CaO2, Cu-BAL and CaO2@Cu-BAL at different concentrations of 0, 25, 50, 100 μg/mL, respectively. After further incubation for 24 h or 48 h, 10 μL MTT was added into each well and co-incubation for 4 h at 37°C. Subsequently, the culture media were replaced by 100 μL of dimethylsulfoxide (DMSO), then it was shocked on a rotary shaker (Thermo scientific,USA) at 25°C , 200 r/min for 15 min. Finally,the absorbance of each well was measured at 570 nm with a microplate reader.

**In Vitro Flow Cytometric Apoptosis Assay**

231 cells were seeded in duplicate in 6-well plates at a density 2×105 cells per well for 24 h at 37°C. After various treatments of CaO2 (100 μg/mL), Cu-BAL (100 μg/mL) or CaO2@Cu-BAL (100 μg/mL) for 16 h at 37°C, After co-incubation, Cells were digested by trypsin without EDTA and collected by centrifugation, Then, the cells were stained by the V-FITC for 20 min and stained by the PI for 5 min at 37°C (Annexin V-FITC/PI Apoptosis Detection Kit). Finally, the cell apoptosis analysis was measured with the flow cytometer.

**Tumor Models**

The procedures in the animal experiments followed the guidelines of the Institutional Animal Care and Use Committee (IACUC) and approved by the Animal Welfare and Ethical Committee of Hebei University. Thirty-six healthy female Balb/c mice (~17 g, four-week-old) were purchased from the Beijing Vital River Laboratory Animal Technology Co., Ltd.  Subcutaneously injecting 5×105 231 cells per mice to establish the 231 xenograft tumor model and were separated into six groups (n=6) for the following experiments.

**In Vivo Antitumor Assay**

Once the tumor had grown to ~50 mm3, four of these groups were injected with PBS (100 μL), CaO2 (100 μL, 5 mg/kg) ,Cu-BAL (100 μL, 5 mg/kg) and CaO2@Cu-BAL (100 μL, 5 mg/kg) via the tail vein injection every 4 days. The drug was administered 6 times in 20 days. Mice were euthanized after treatment, cancer tissues and main organs were harvested from the sacrificed mice for histological analysis and the blood were collected for hematology studies.

**Biodistribution Study**

CaO2@Cu-BAL was labeled with Cy5. Briefly, 3 mL Cy5 /ethanol solution (0.1 mg/mL) was mixed with 5 mg CaO2@Cu-BAL then it was stirred for 24 h in dark at room temperature. Finally, Cy5-labeled CaO2@Cu-BAL nanoparticles were obtained by centrifugation at 10000 rpm for 10 min and washed three times with ethanol absolute. The tumor-bearing mice were intravenously injected with Cy5-labeled CaO2@Cu-BAL (5 mg/kg, 100 μL) at indicated time points (6, 12, 24 and 48 h). the mice were sacrificed to collect the major organs (heart, liver, spleen, kidney, lung) and tumor. These tissues of the nanoparticles biodistribution were investigate by a small animal imager (Calper, USA).

**Toxicity Study of Copper**

When the tumor sizes reached about 50 mm3,The in vivo systemic toxicity of the Cu ions was evaluated by intravenous injection into into BALB/c mice mice with CaO2@Cu (100 μL, 5 mg/kg, every four day). The drug was administered 6 times in 20 days. Mice were euthanized after treatment, cancer tissues and main organs were harvested from the sacrificed mice for histological analysis and the blood were collected for hematology studies.

**In Vivo Biodistribution of Cu**

Three groups of tissues and organs (heart, liver, spleen, lung, kidney and tumour) were taken from each of PBS,CaO2@Cu and CaO2@Cu-BAL, After freeze-dried and crushed, each sample was weighed 10 mg and then digested by concentrated nitric acid (HNO3, 67%) for 12h (70°C), The clear yellow solutions was evaporated dry at 120°C and then add 2 mL dilute hydrochloric acid (HCl, 1%). The resulting solutions after  passing the membrane (200 nm) were prepared for the ICP-OES test.

Statistical Analysis

Data are presented as mean ± standard deviation (SD). Significance was assessed using Student’s two-sided t-test (*p < 0.05, **p < 0.01, ***p < 0.001).

**Table S1.** Reported Reaction Rates of Cu(I), Cu(II), Fe(II), and Fe(III) with H2O2

| Variables | Reaction Rate |
| --- | --- |
| Cu(I) | 1.0×104 M-1s-1 |
| Cu(II) | 5×102 M-1s-1 |
| Fe(II) | 5×101 M-1s-1 |
| Fe(III) | 1×10-2 M-1s-1 |


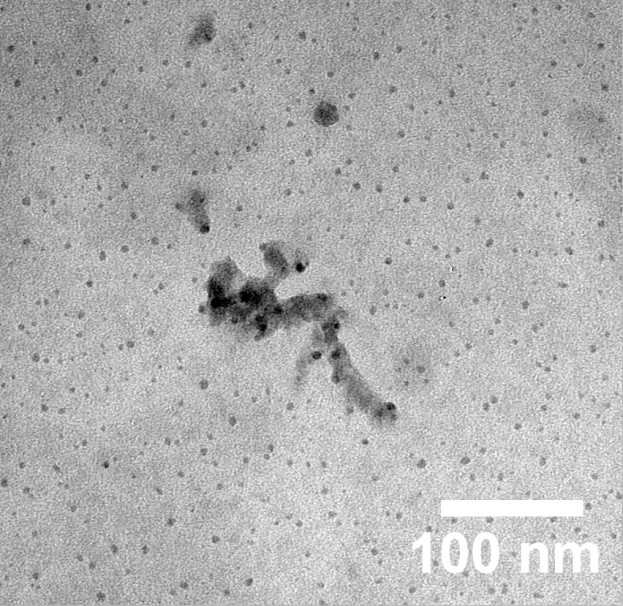


**Figure S1.** TEM image of CaO2@Cu-BAL after dissolution in the buffer solution


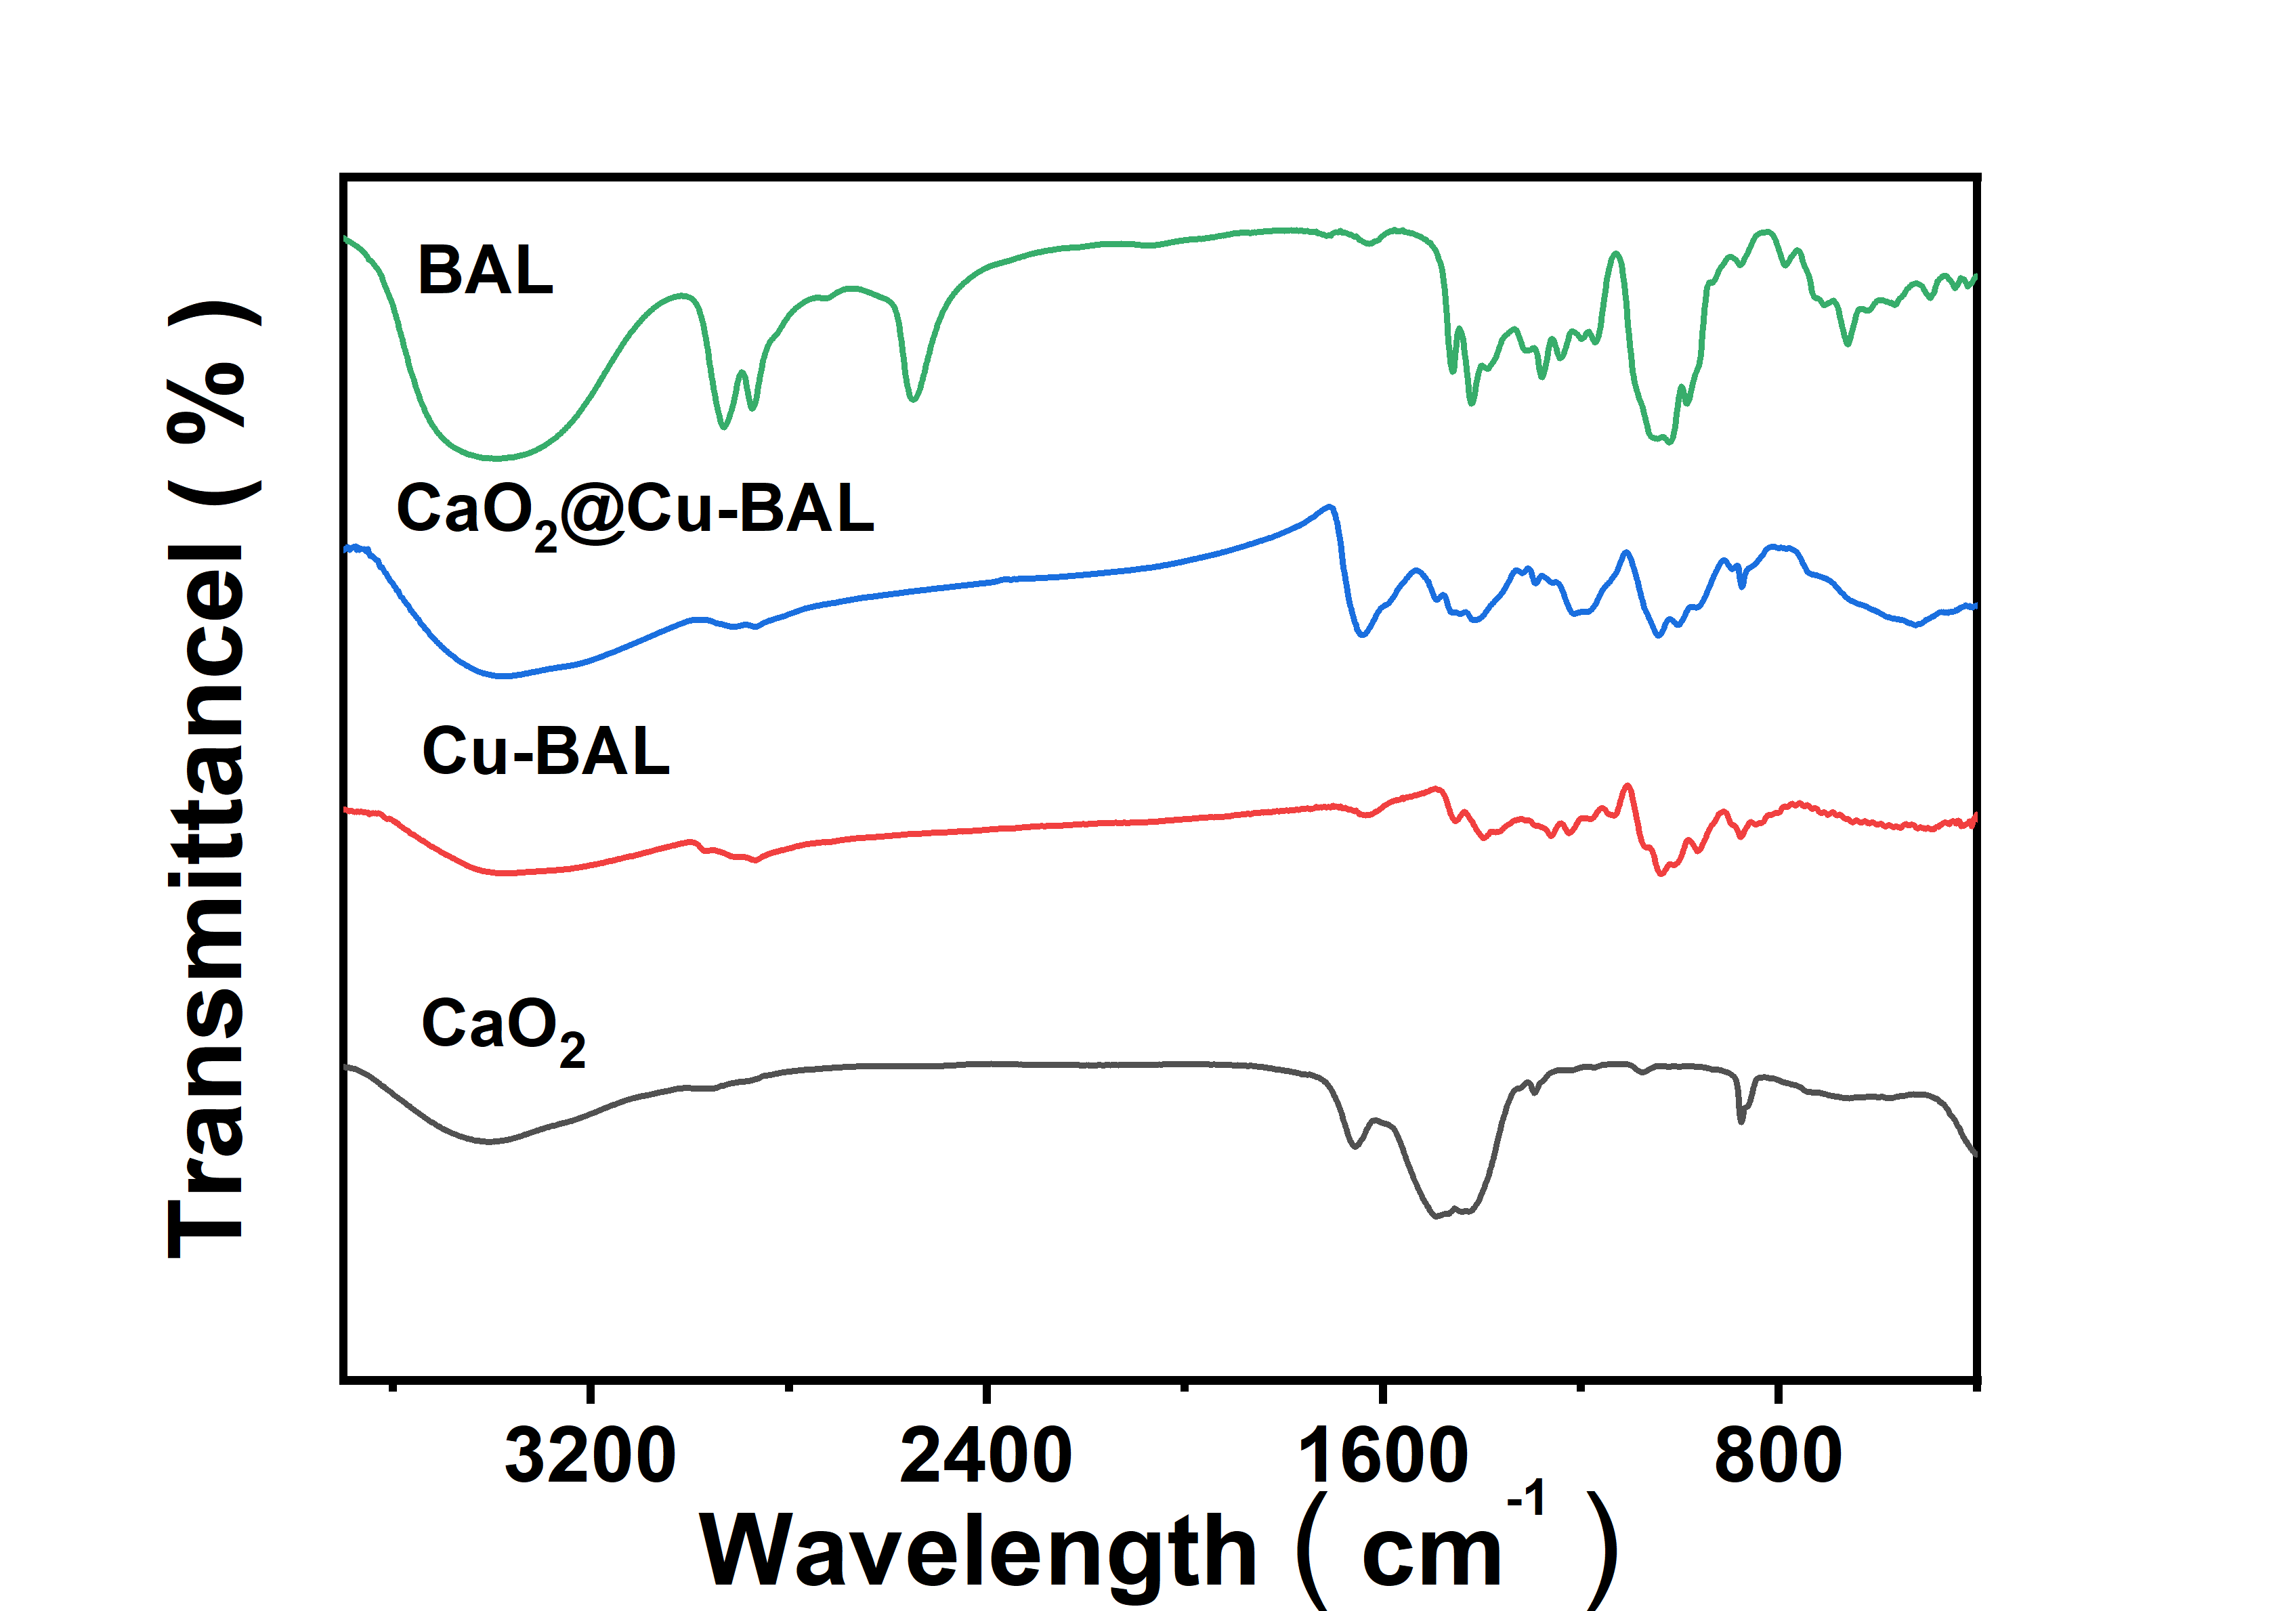


**Figure S2.** FTIR spectra of BAL, CaO2, Cu-BAL, and CaO2@Cu-BAL


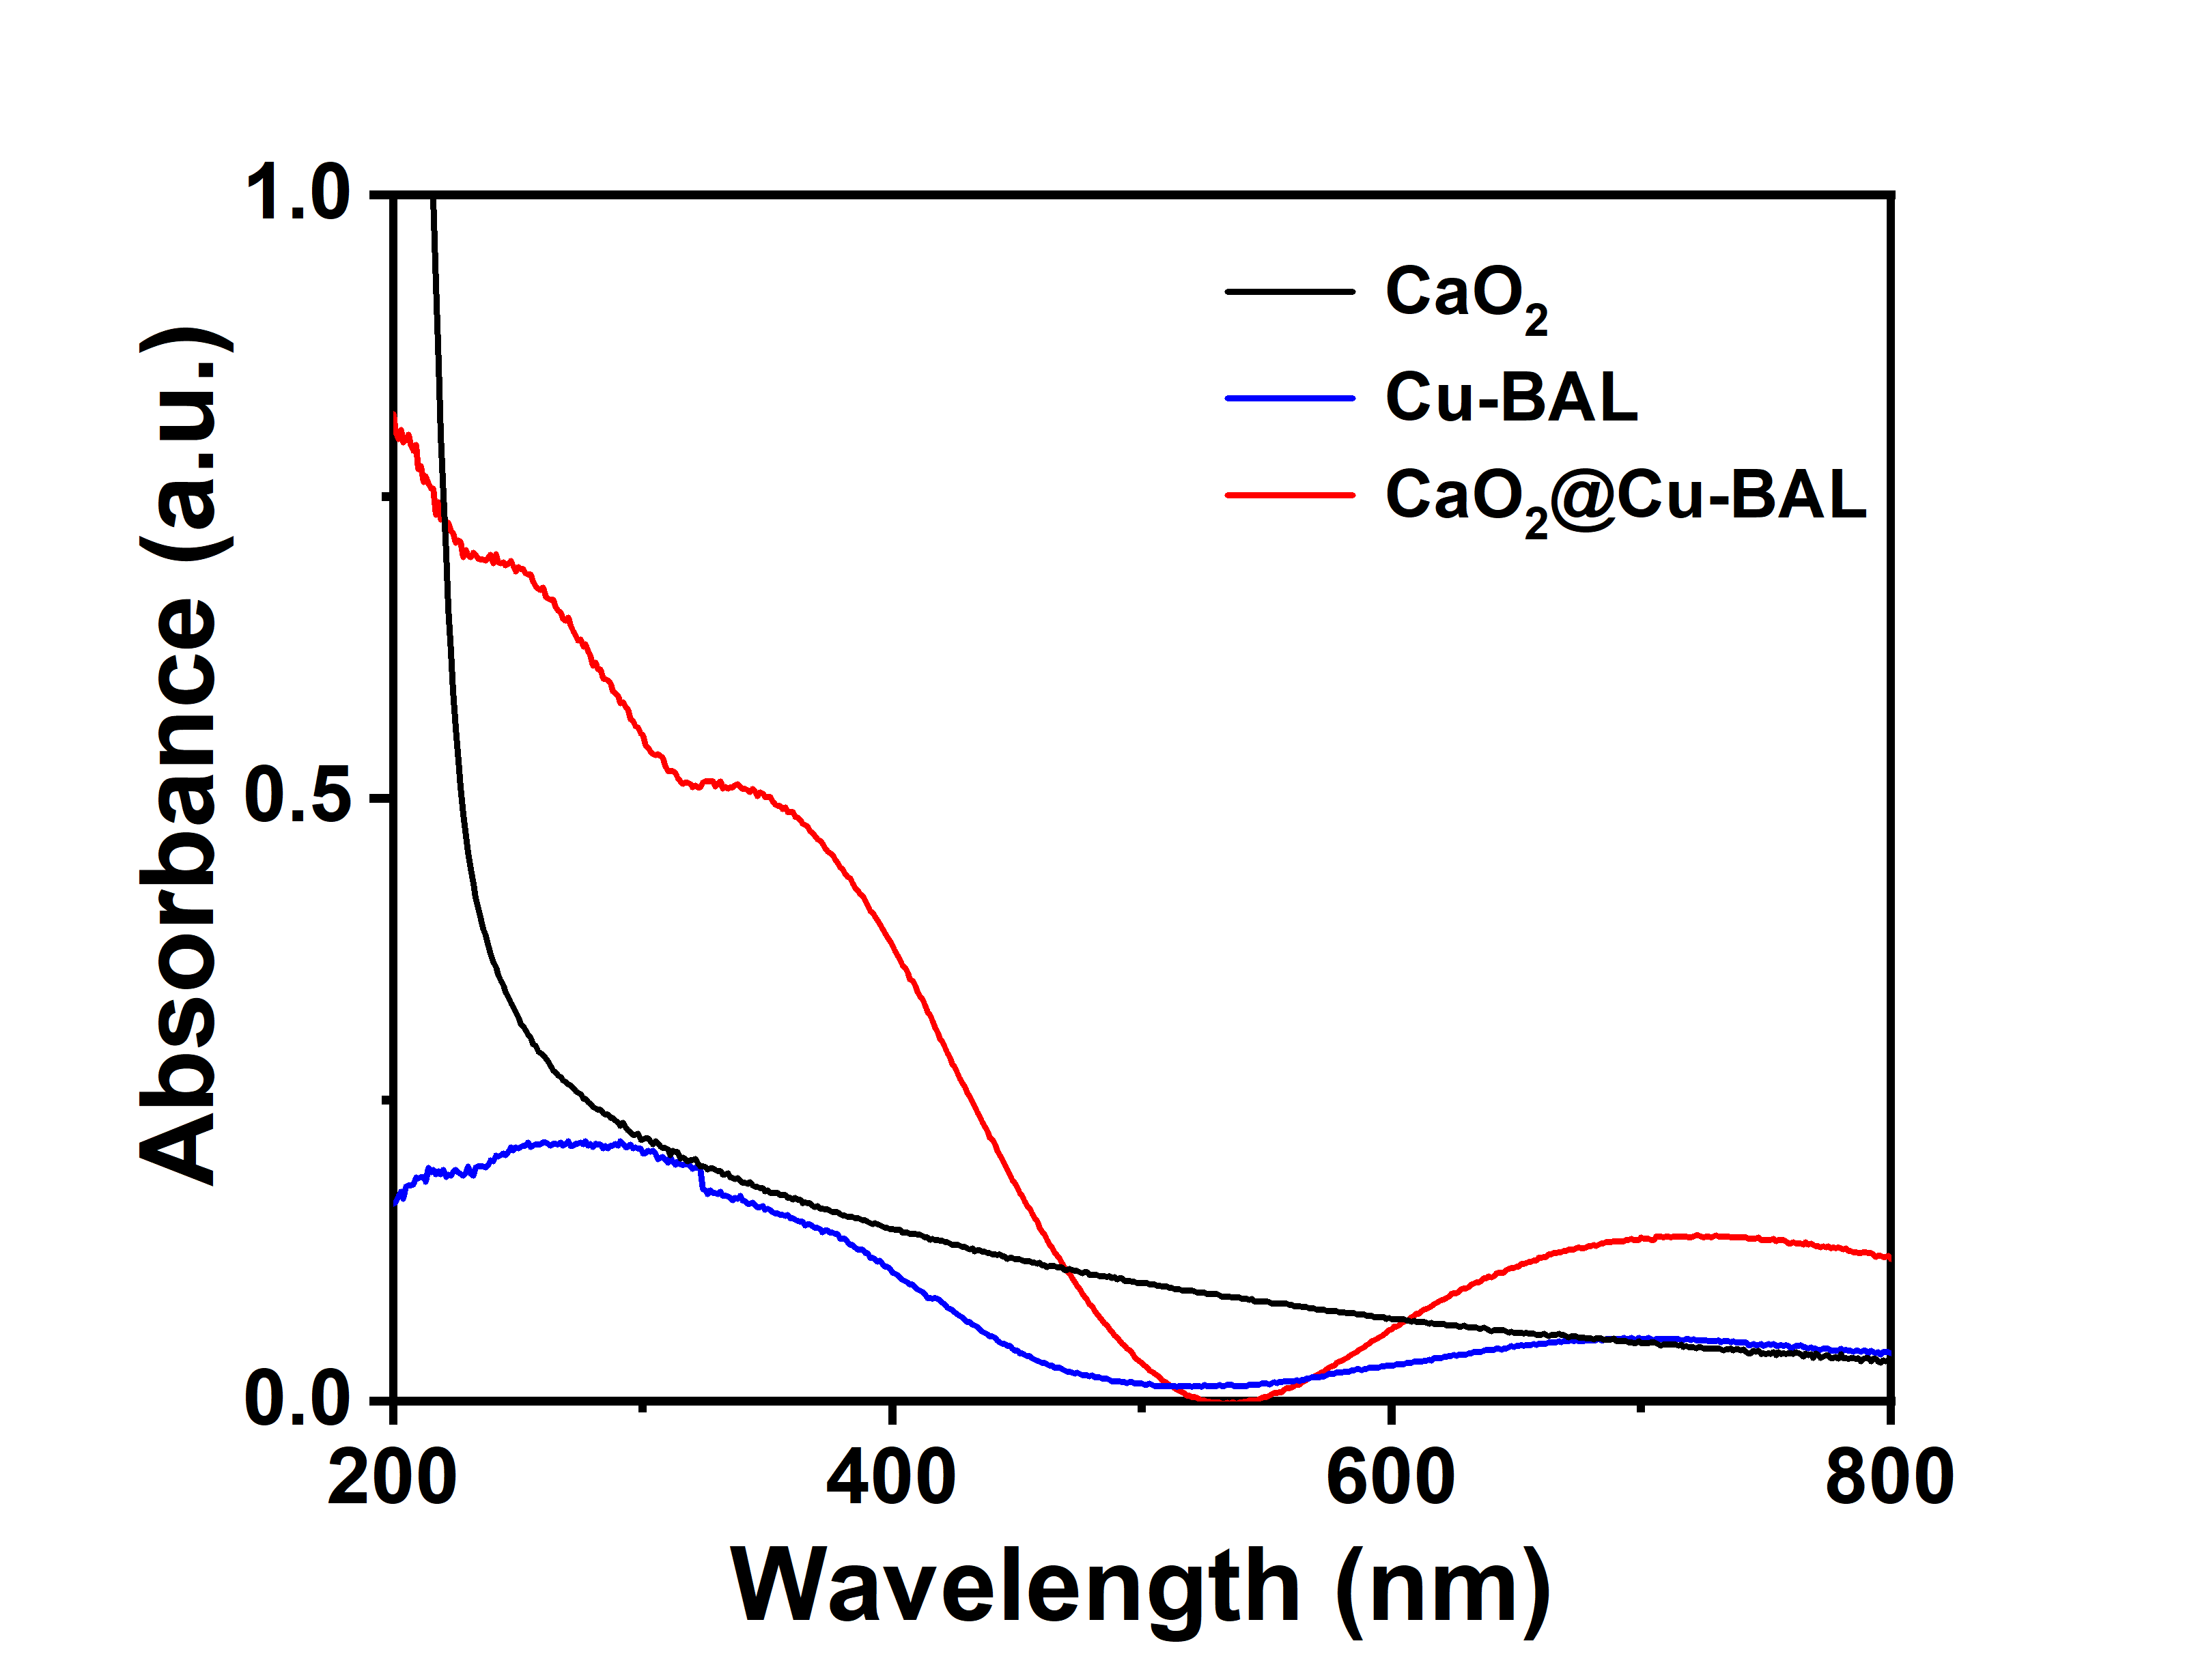


**Figure S3.** UV-vis absorption spectra of CaO2, Cu-BAL, and CaO2@Cu-BAL


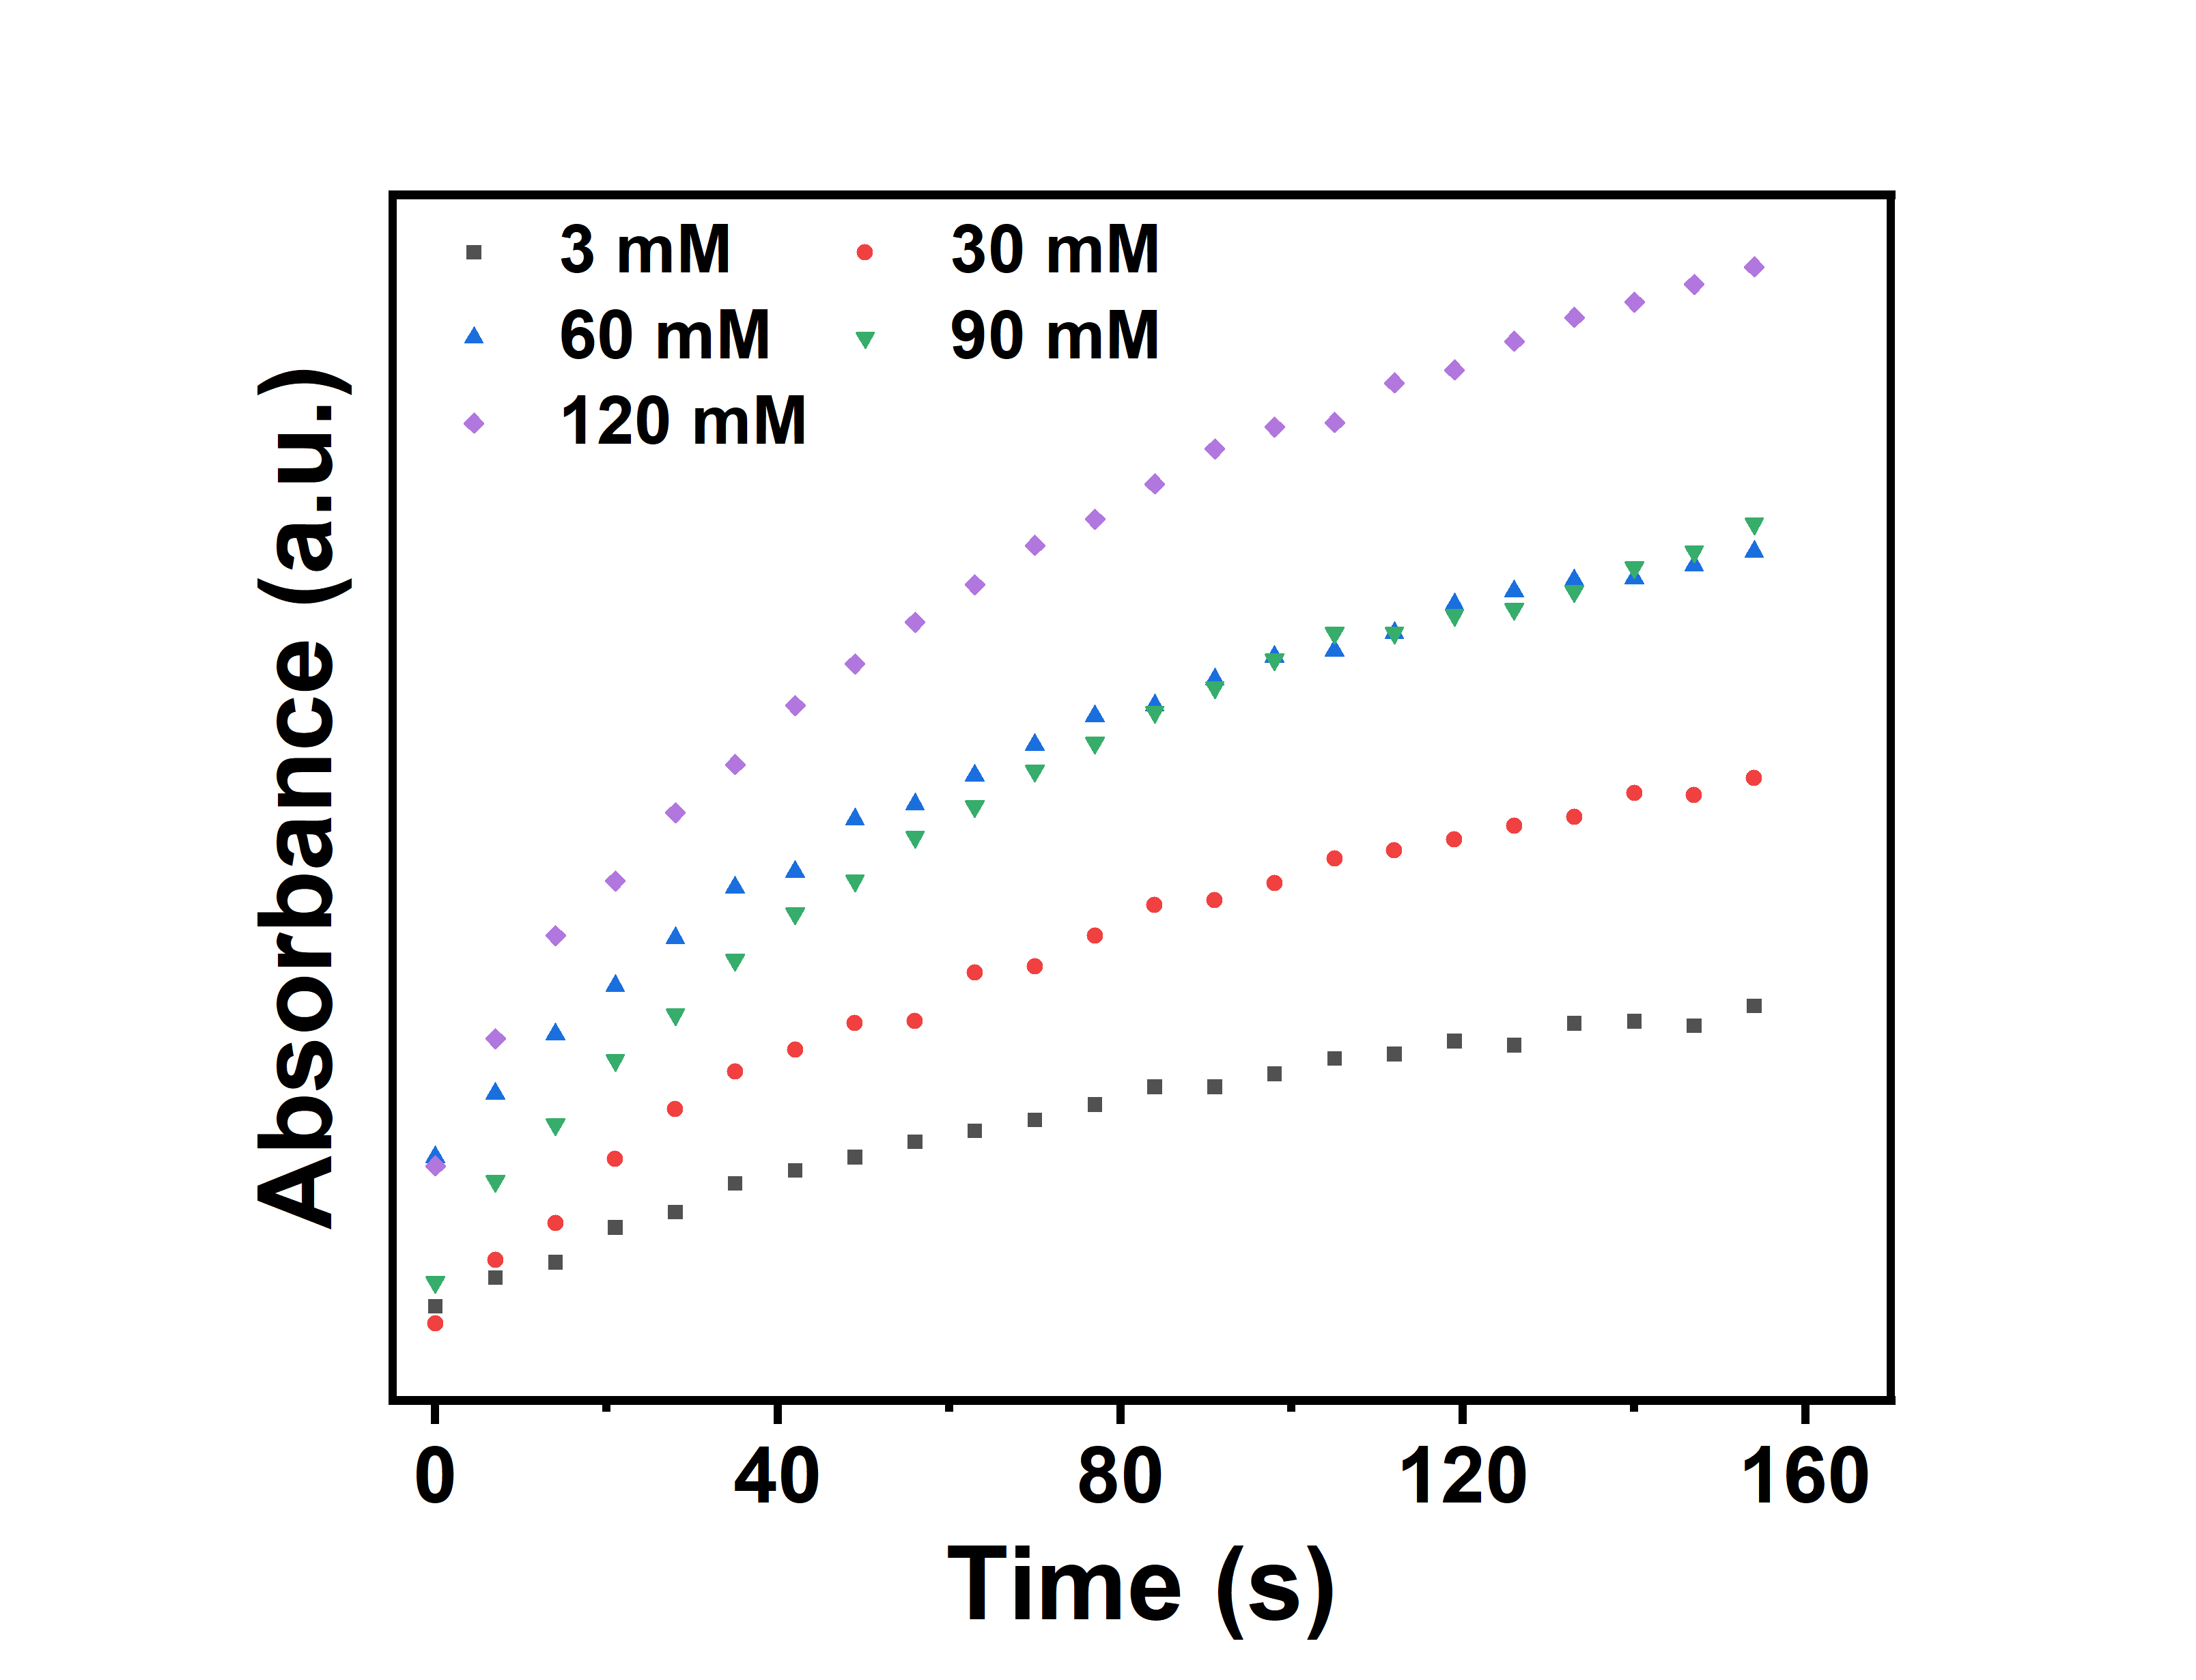


**Figure S4.** Kinetics of ox-TMB oxidation by Cu-BAL with varying H2O2 concentrations (30-120 mM) at 650 nm


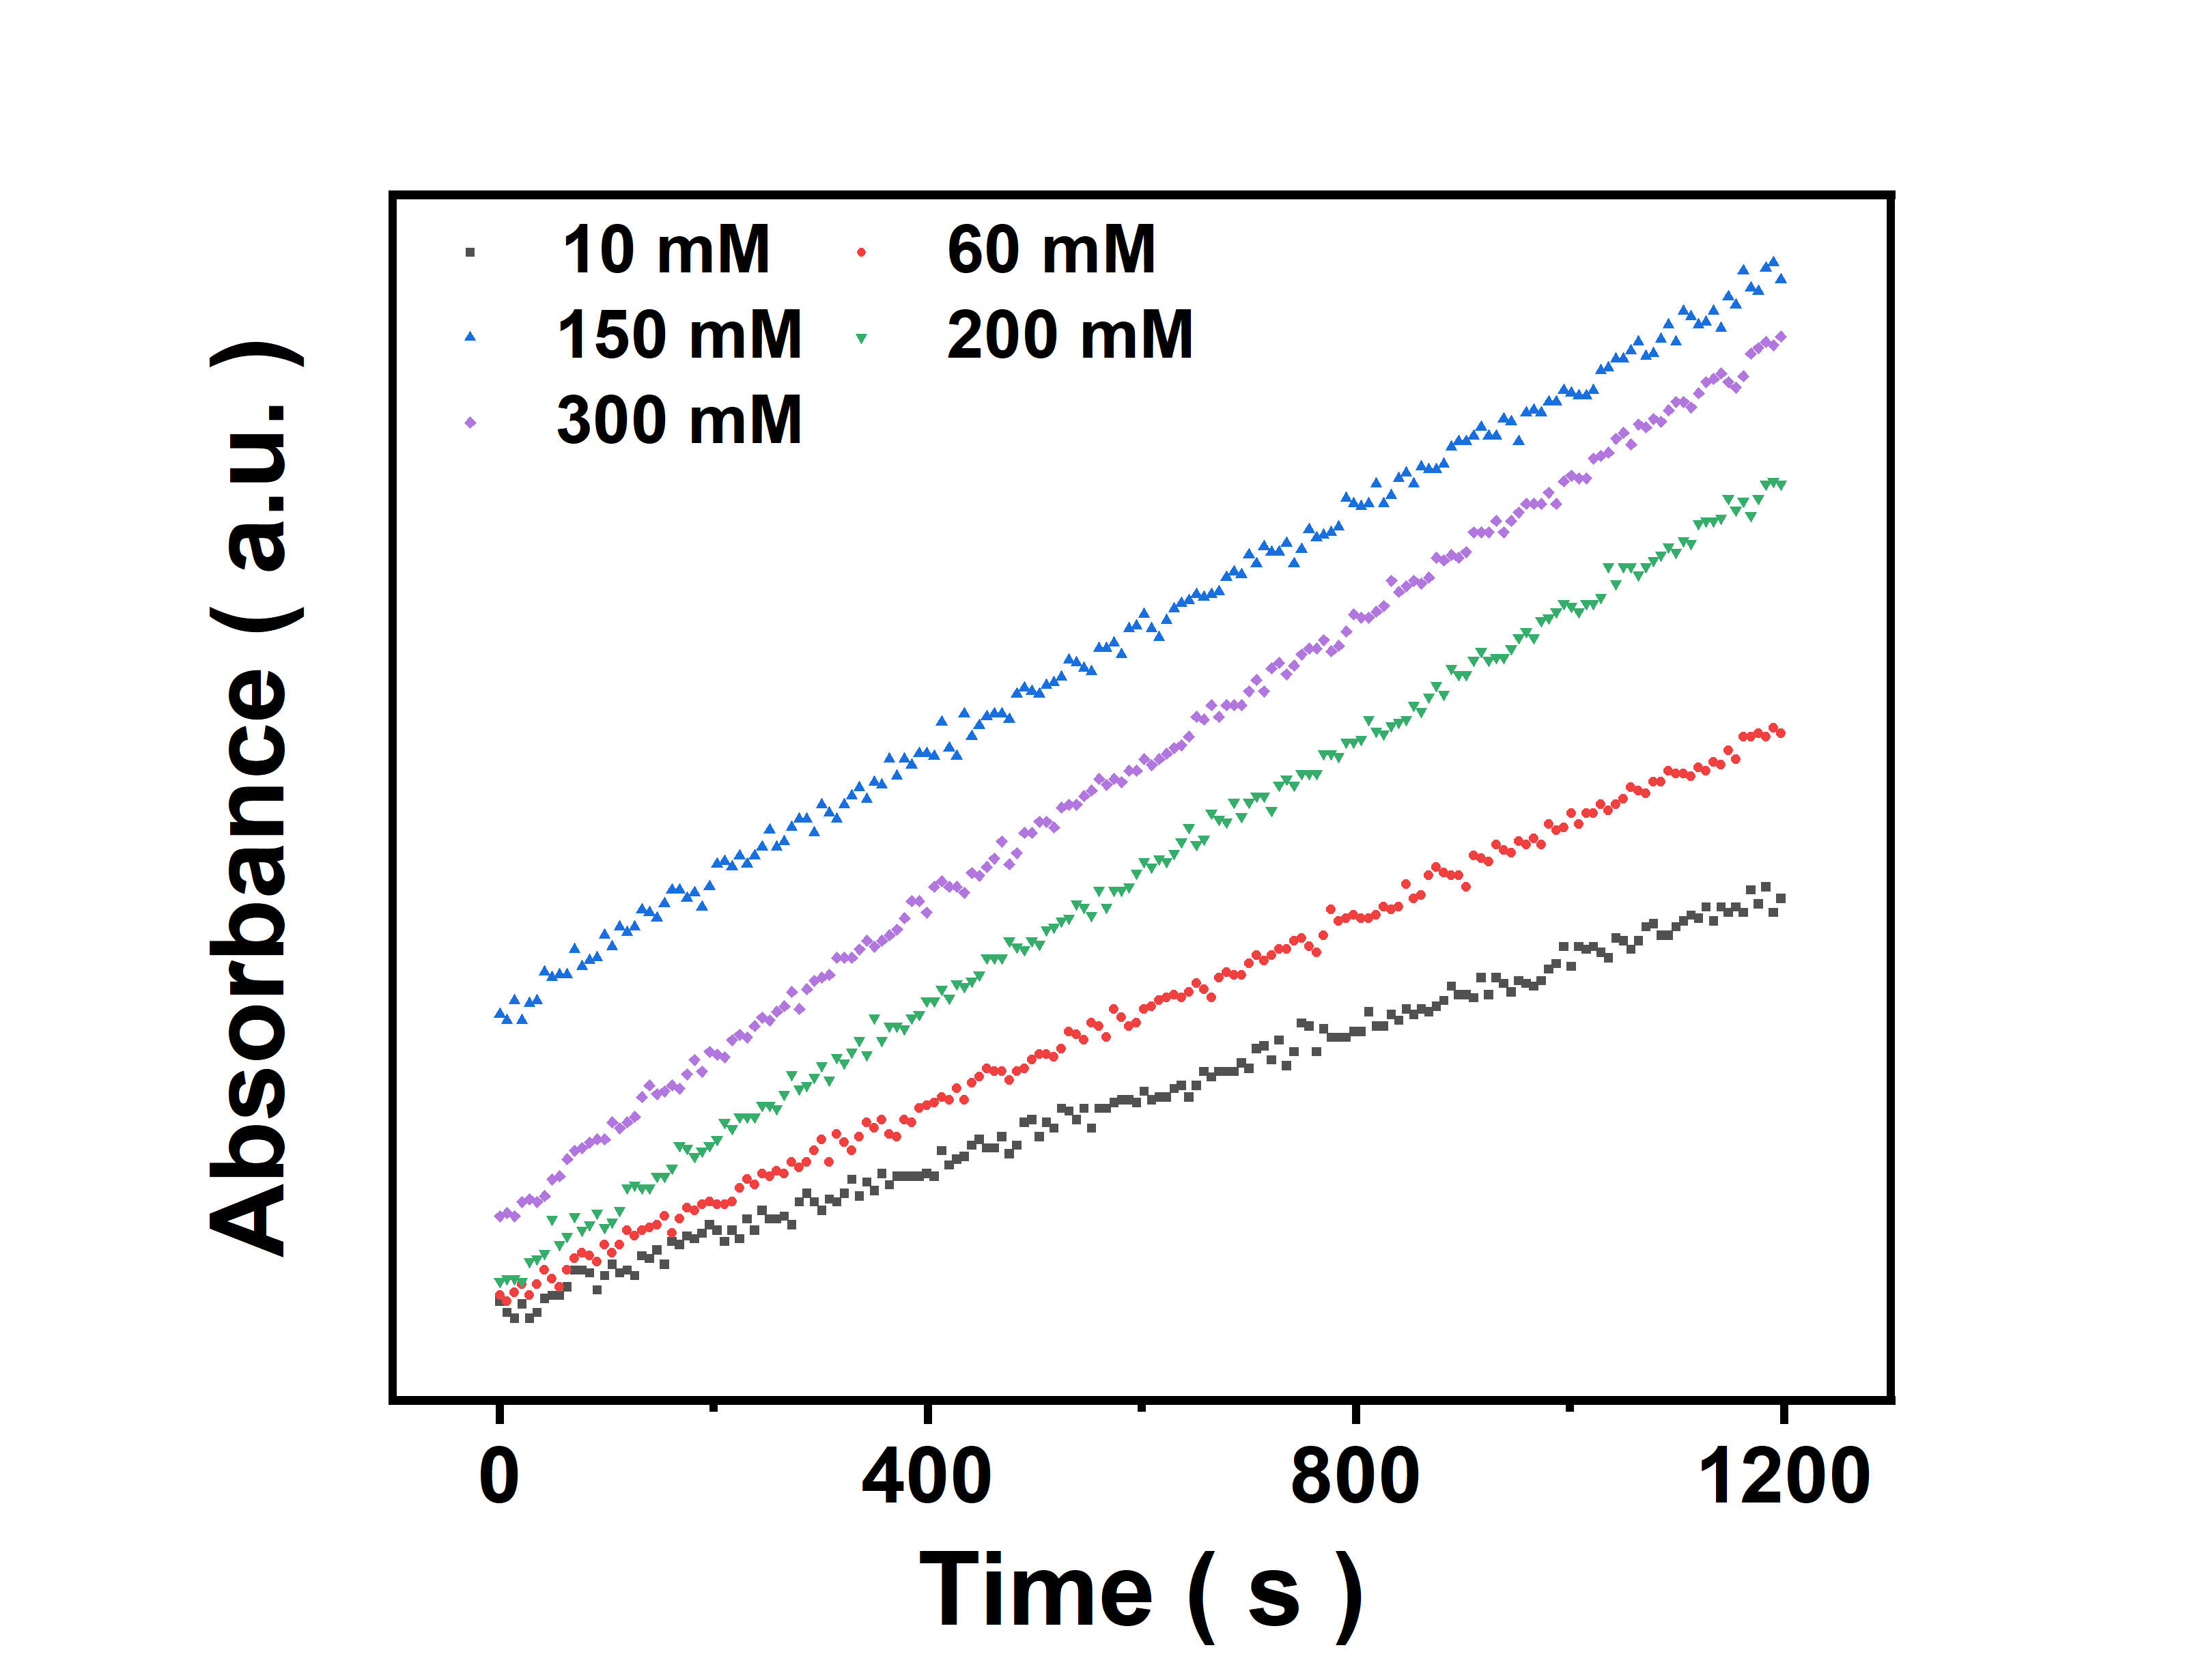


**Figure S5** Kinetics of ox-TMB oxidation by Fe3O4 with varying H2O2 concentrations (10-300 mM) at 650 nm
